# Supplementary material for: Hsf transcription factor gene family in peanut (Arachis hypogaea L.): genome-wide characterization and expression analysis under drought and salt stresses
Source: Frontiers journal article supplement (doi:10.3389/fpls.2023.1214732), 2023-07-05
Supplement: Data_Sheet_1.ZIP [file Data_Sheet_1.ZIP]

**HR-B**

**C**

**B**
